# Supplementary figures and images for: Tissue alarmins and adaptive cytokine induce dynamic and distinct transcriptional responses in tissue-resident intraepithelial cytotoxic T lymphocytes
Source: PubMed Central journal article supplement — J Autoimmun. 2020 Mar;108:102422. doi: 10.1016/j.jaut.2020.102422 (PMC7049906; doi:10.1016/j.jaut.2020.102422), 2020-03

**A**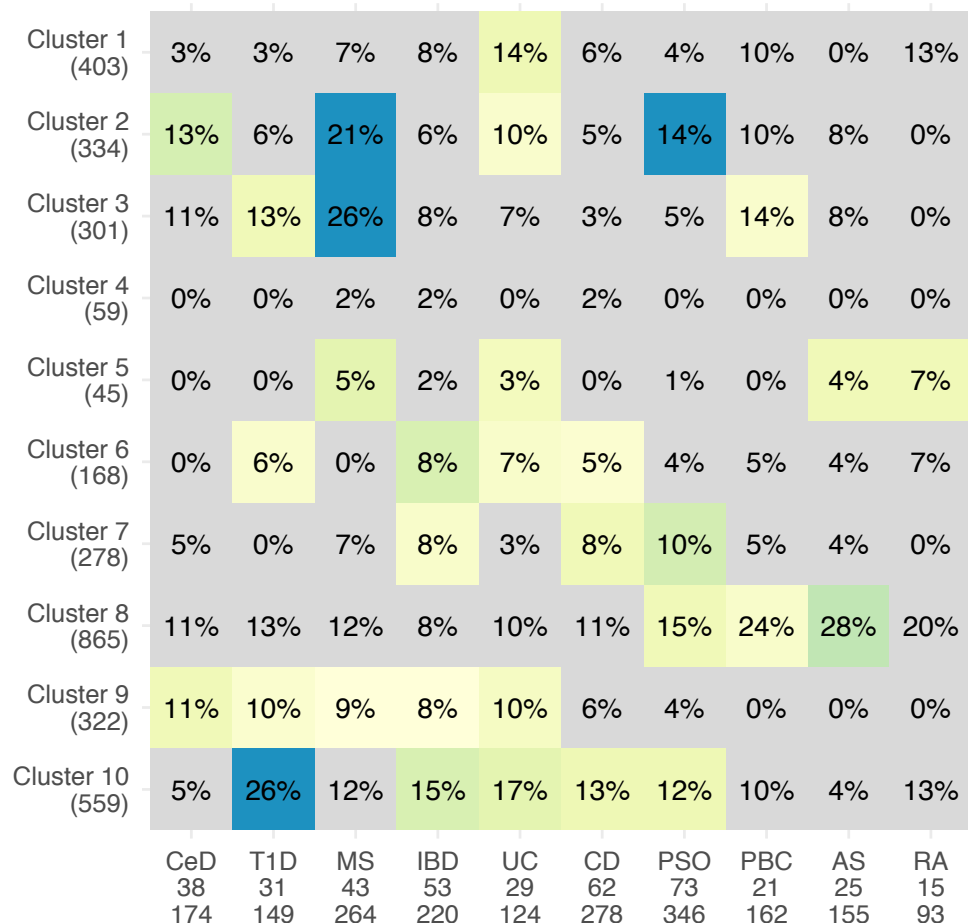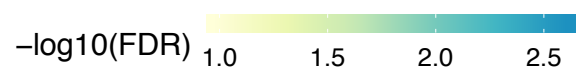**B**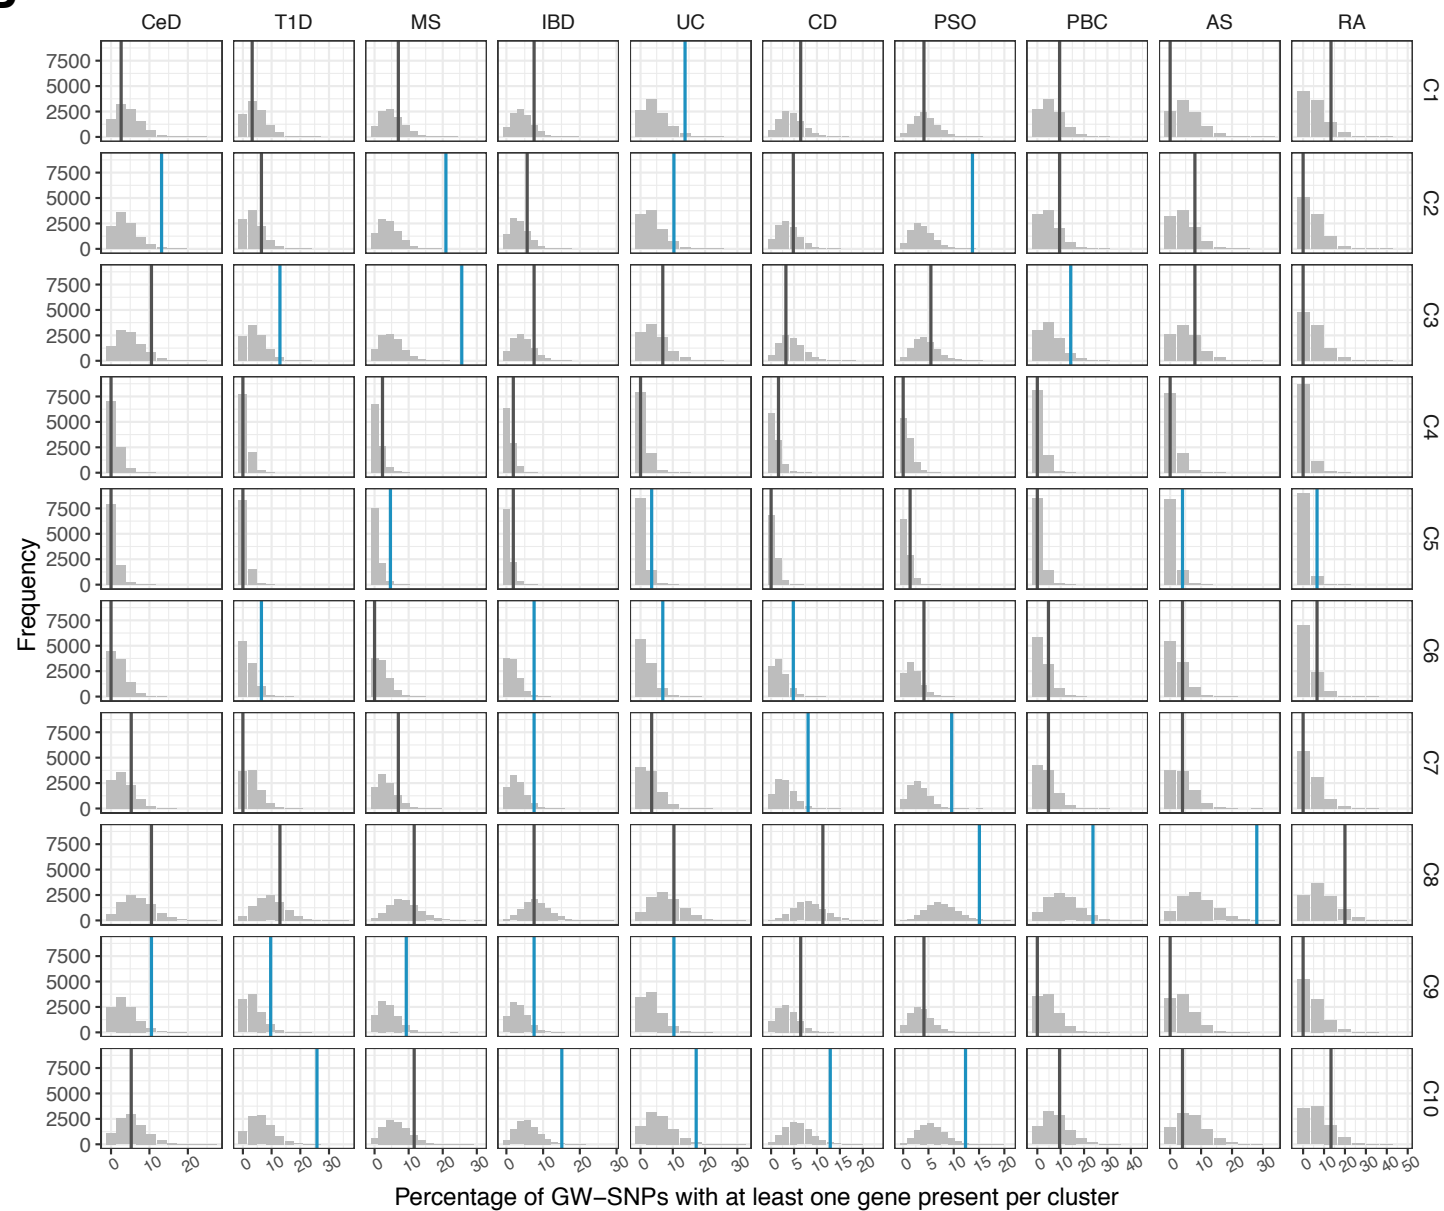

Supplement: mmc10.pdf [file mmc10.pdf]

**A**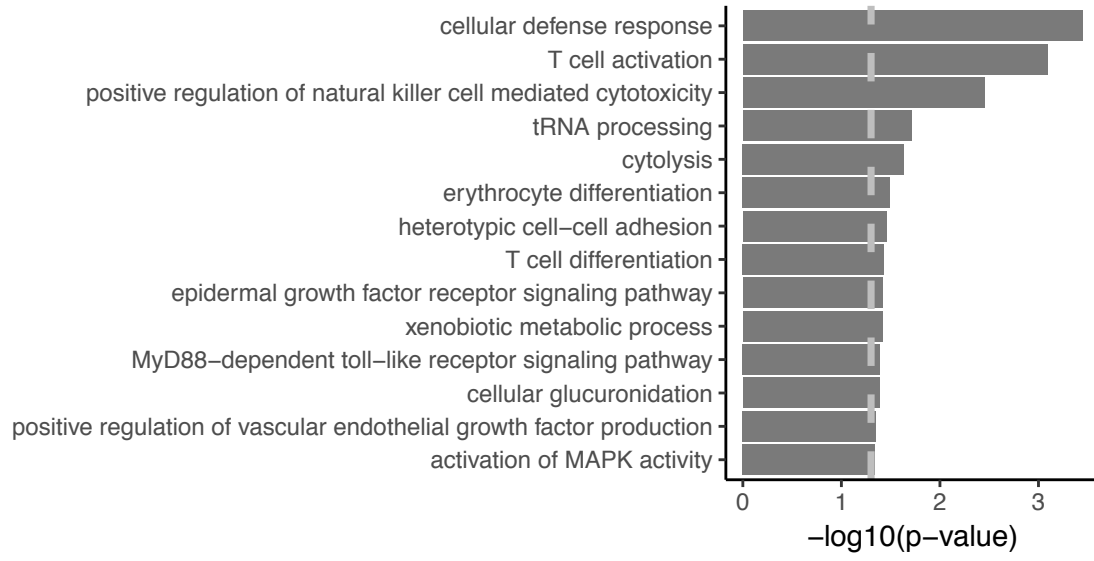**B**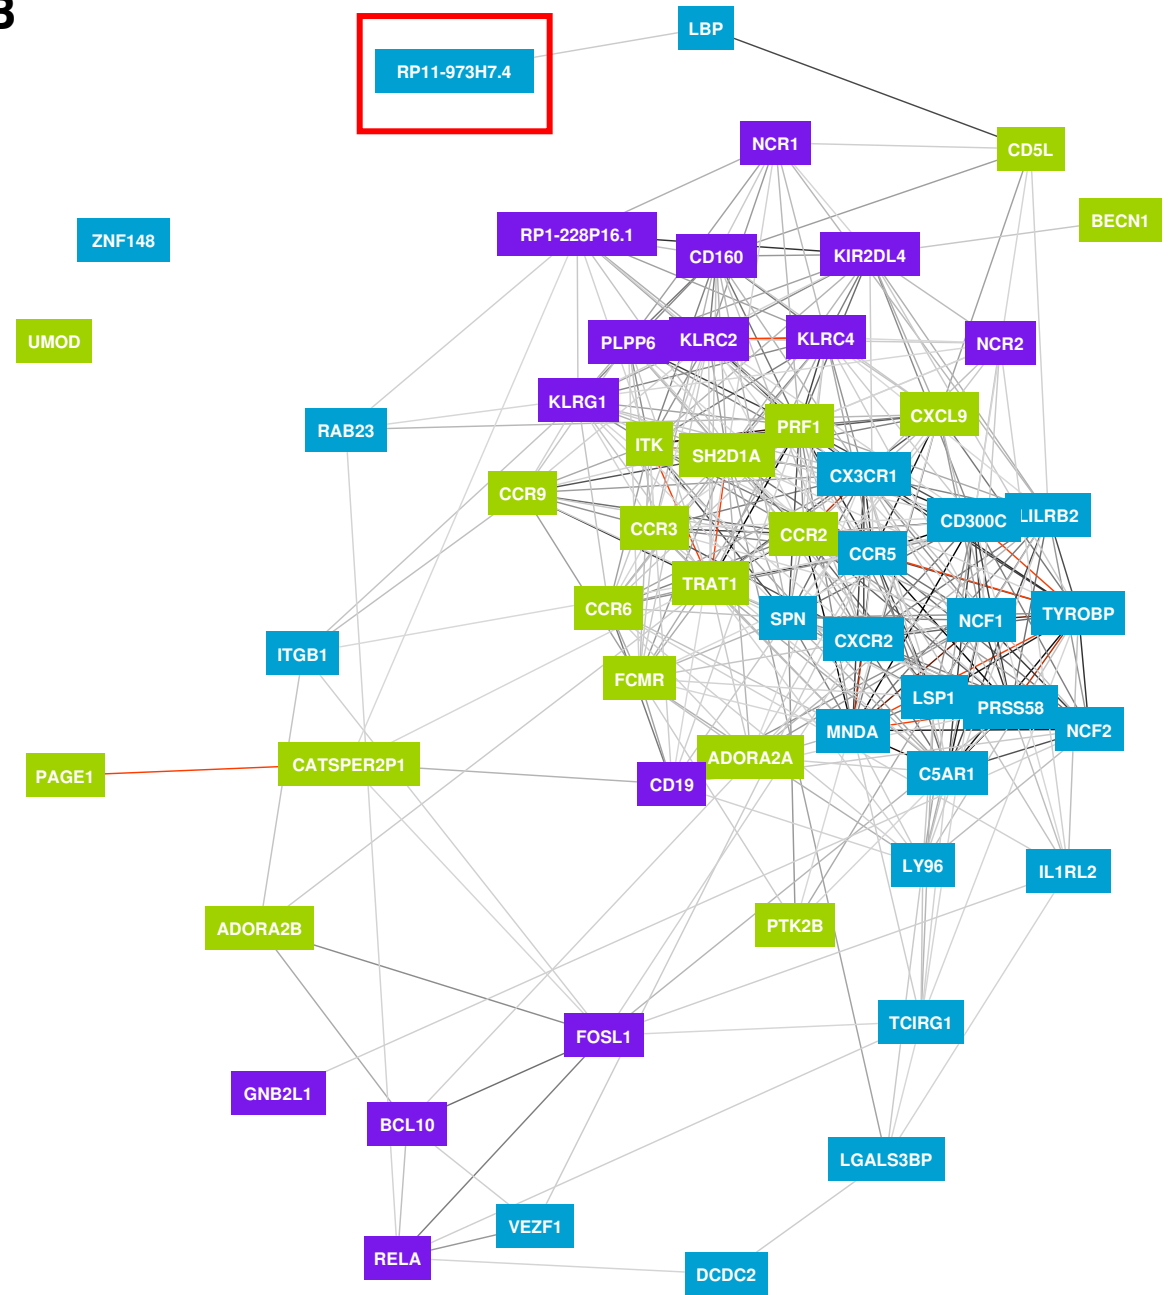

Supplement: mmc11.pdf [file mmc11.pdf]

**A**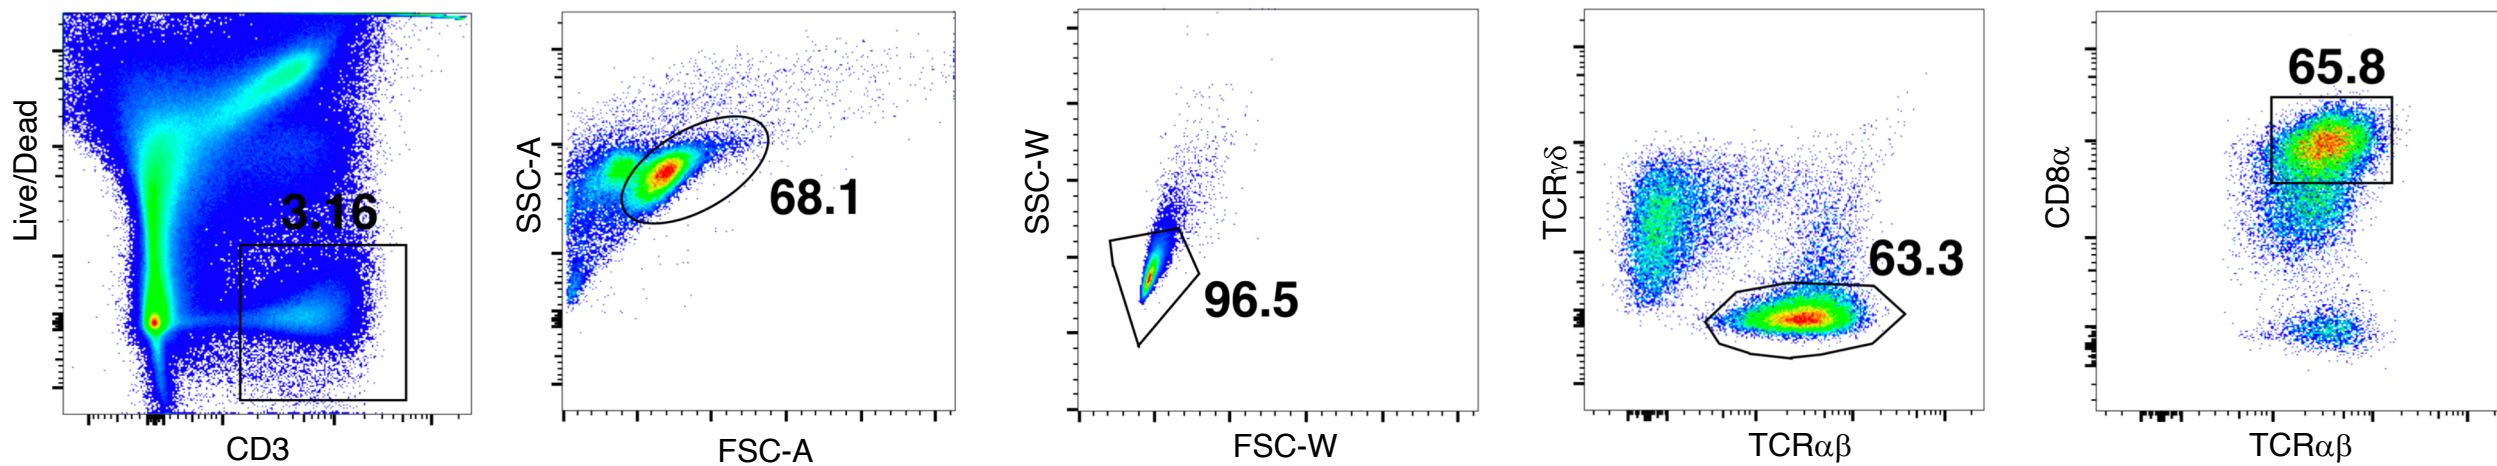**B**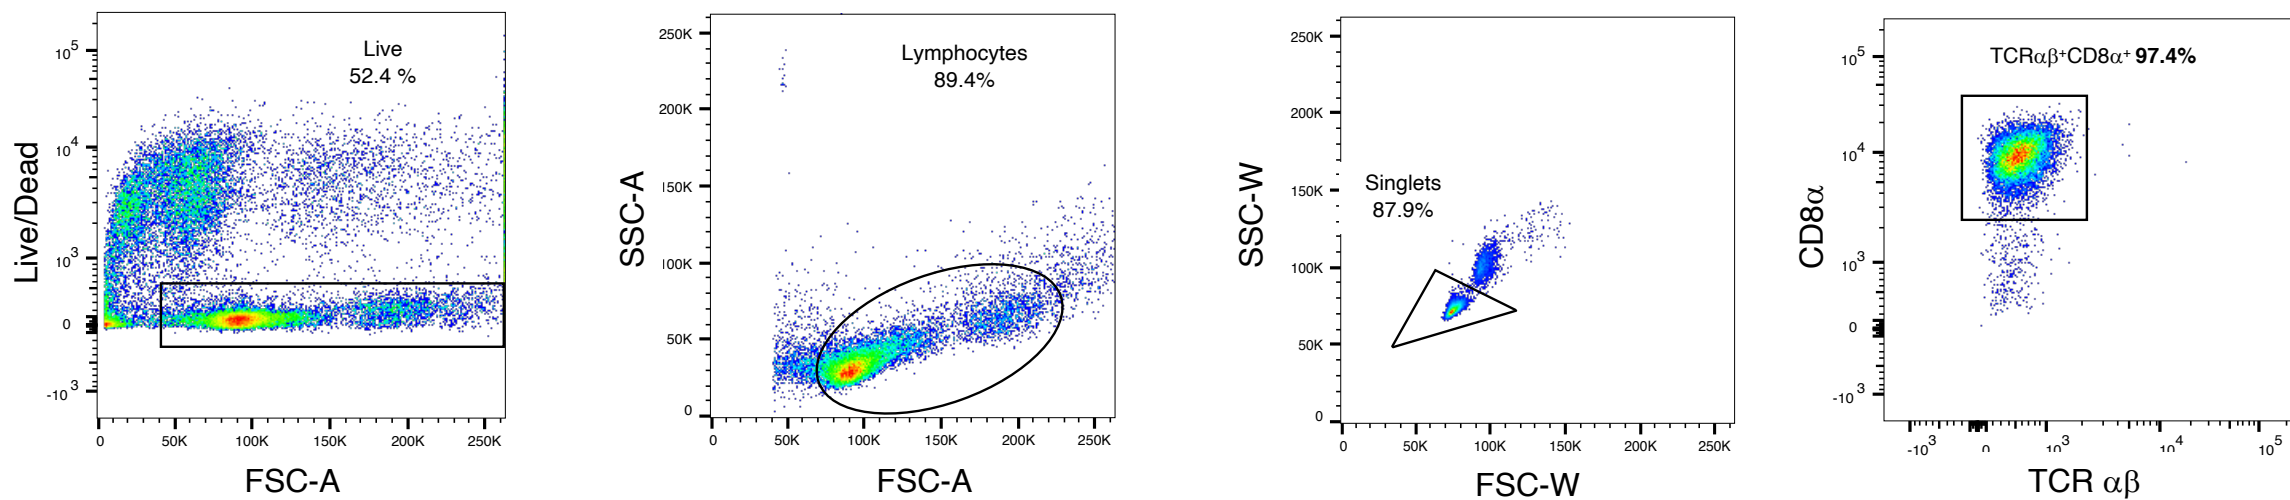

Supplement: mmc2.pdf [file mmc2.pdf]

**A**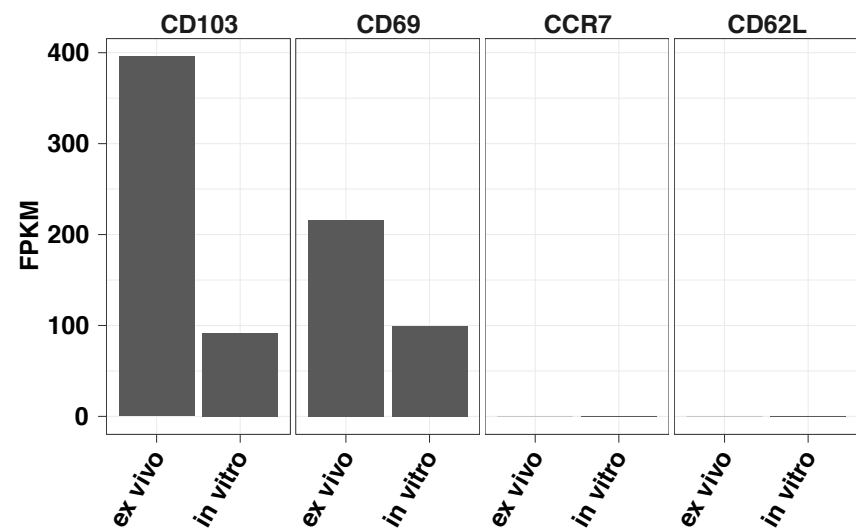**B**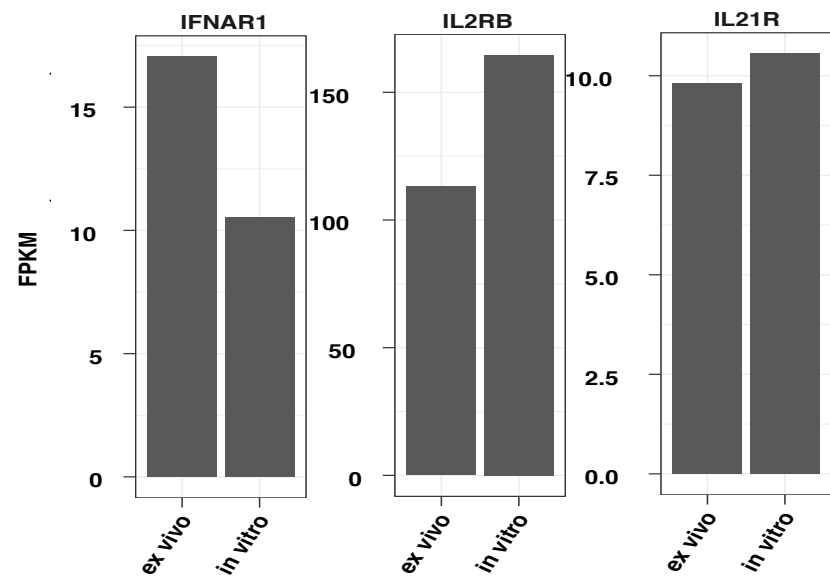

Supplement: mmc3.pdf [file mmc3.pdf]

- GRB
- ▼ IFNg
- BCL2

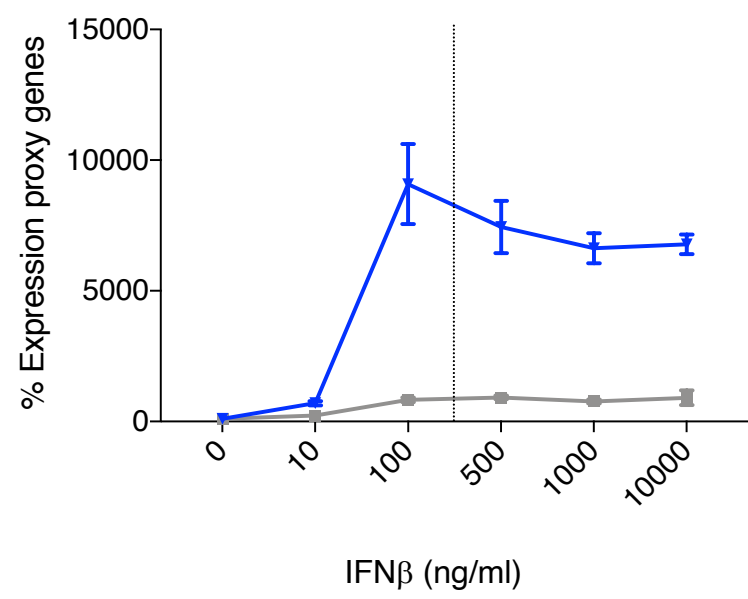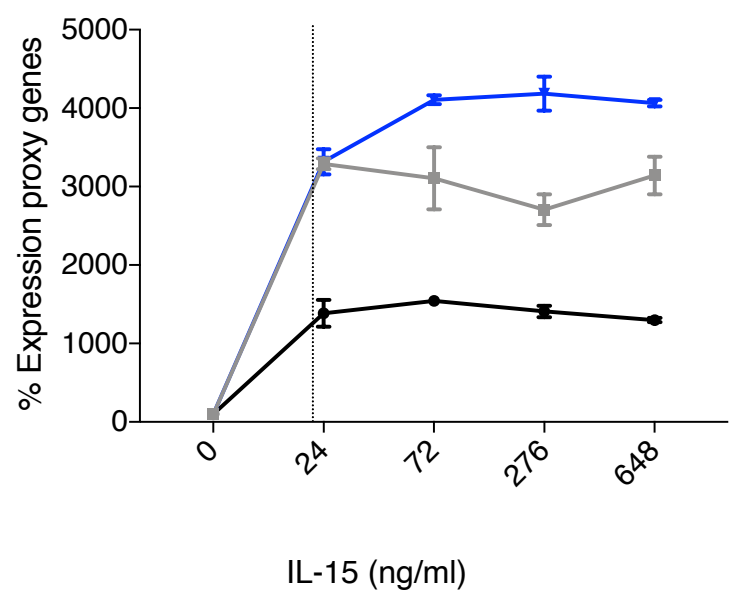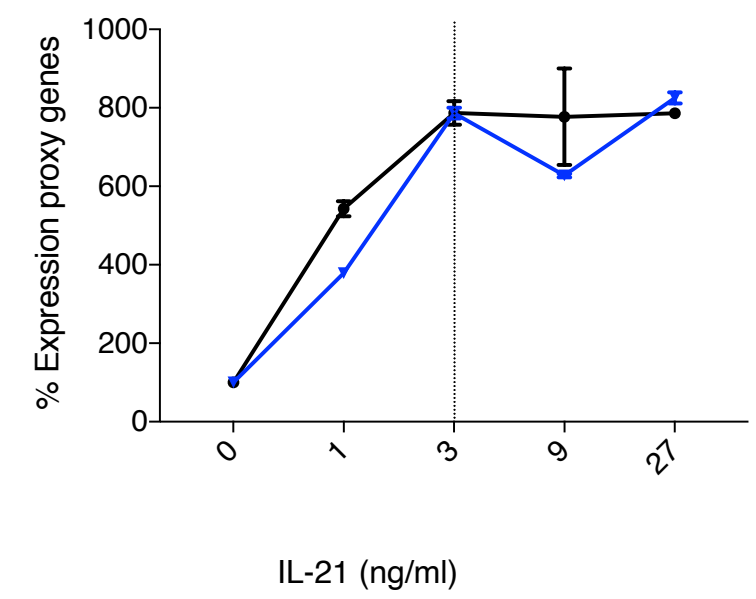

Supplement: mmc4.pdf [file mmc4.pdf]

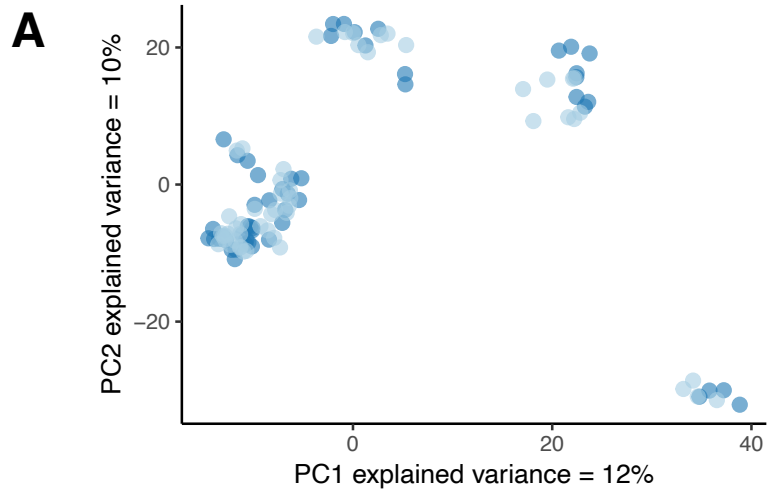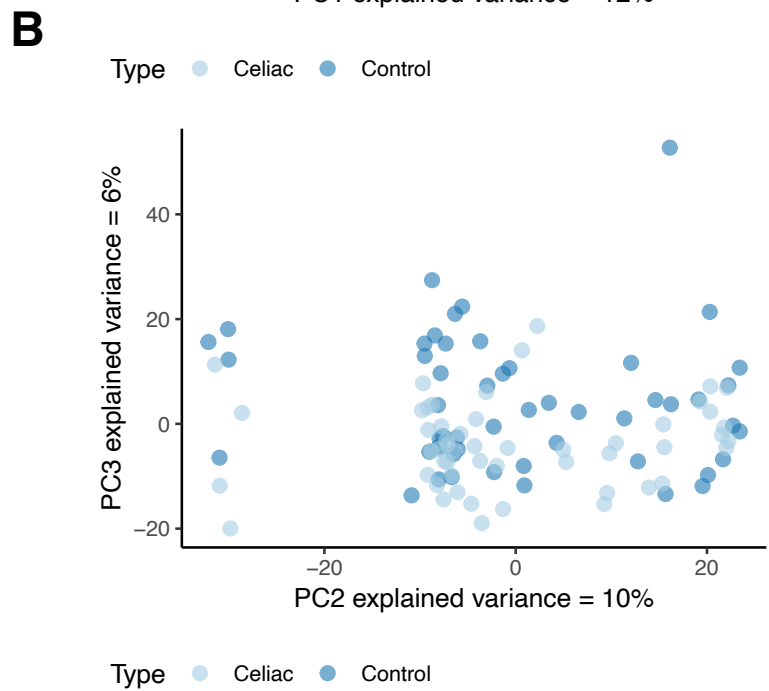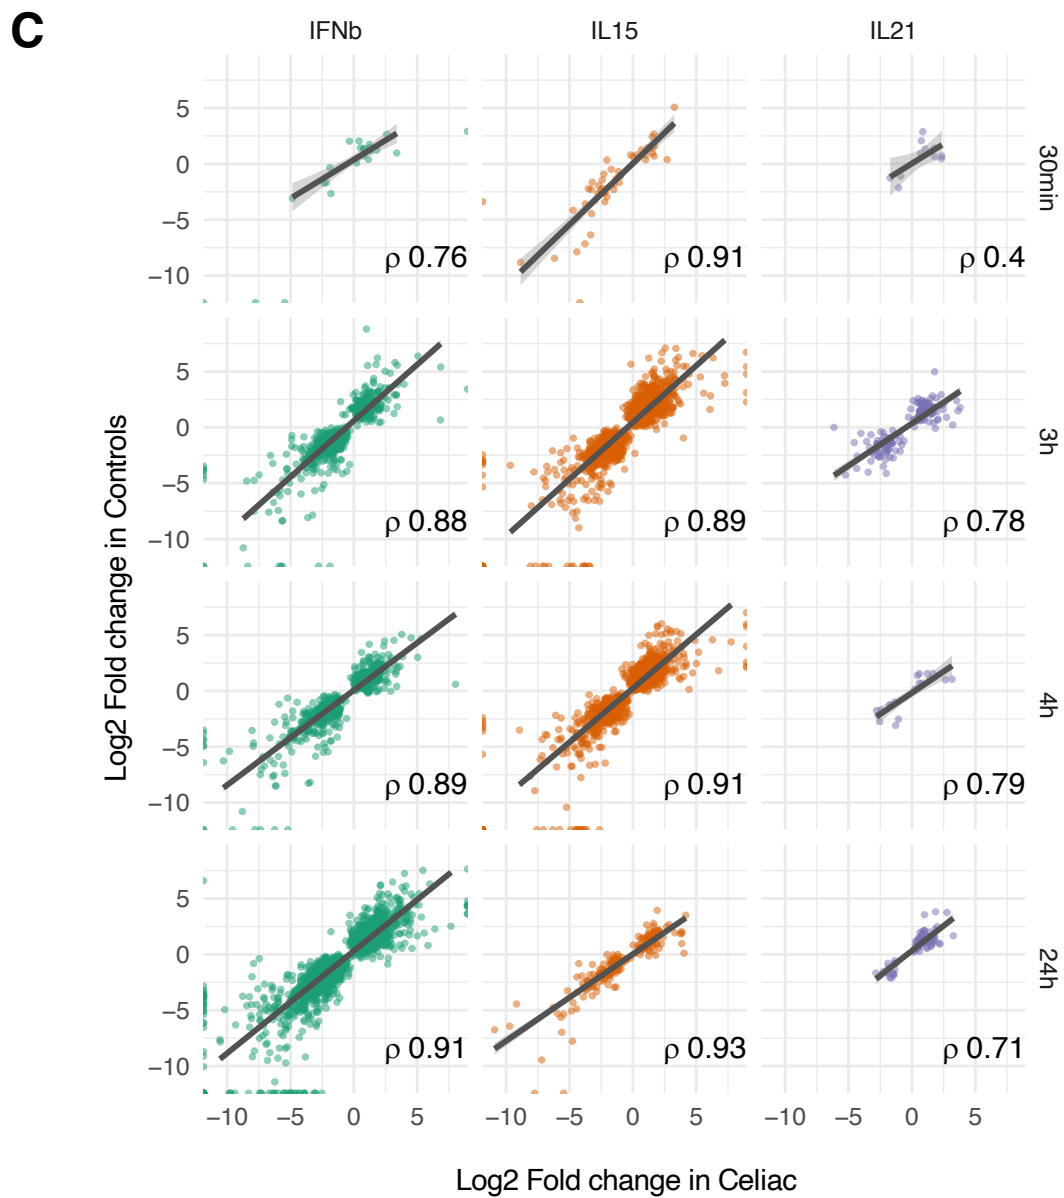

Supplement: mmc5.pdf [file mmc5.pdf]

**A****IFN $\beta$** 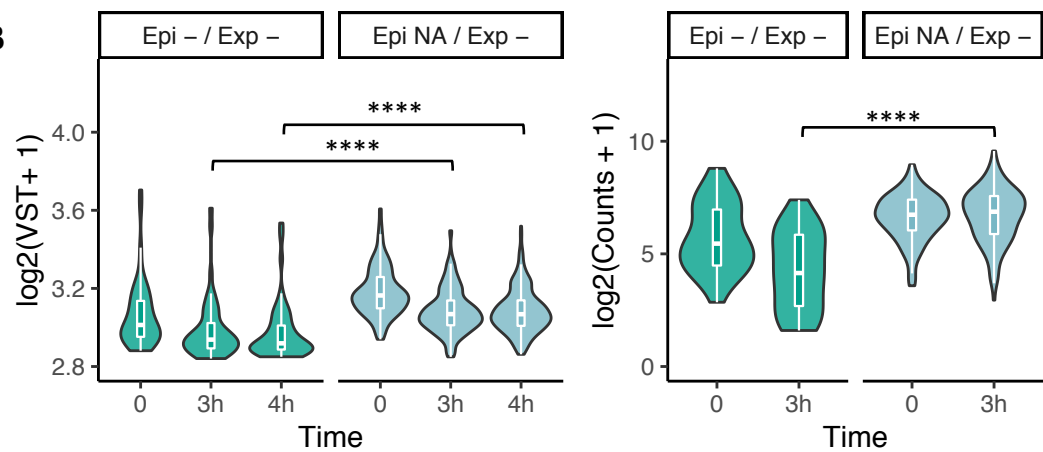**IL-15**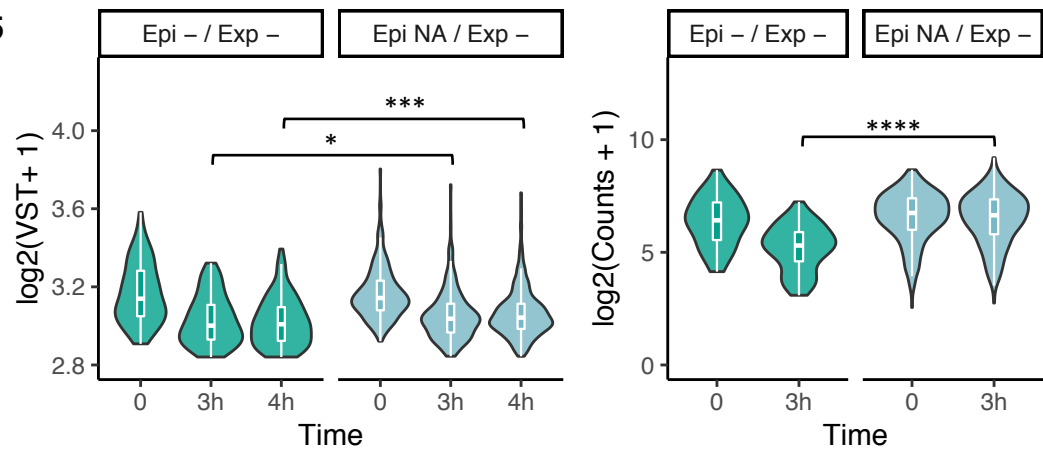**B**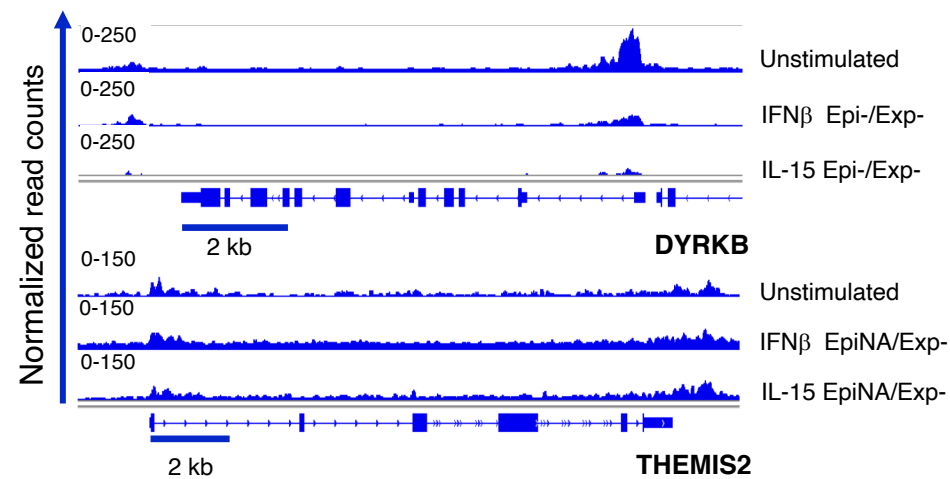**C**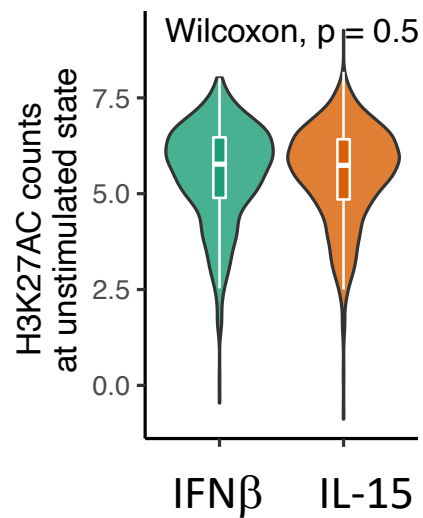

Supplement: mmc6.pdf [file mmc6.pdf]

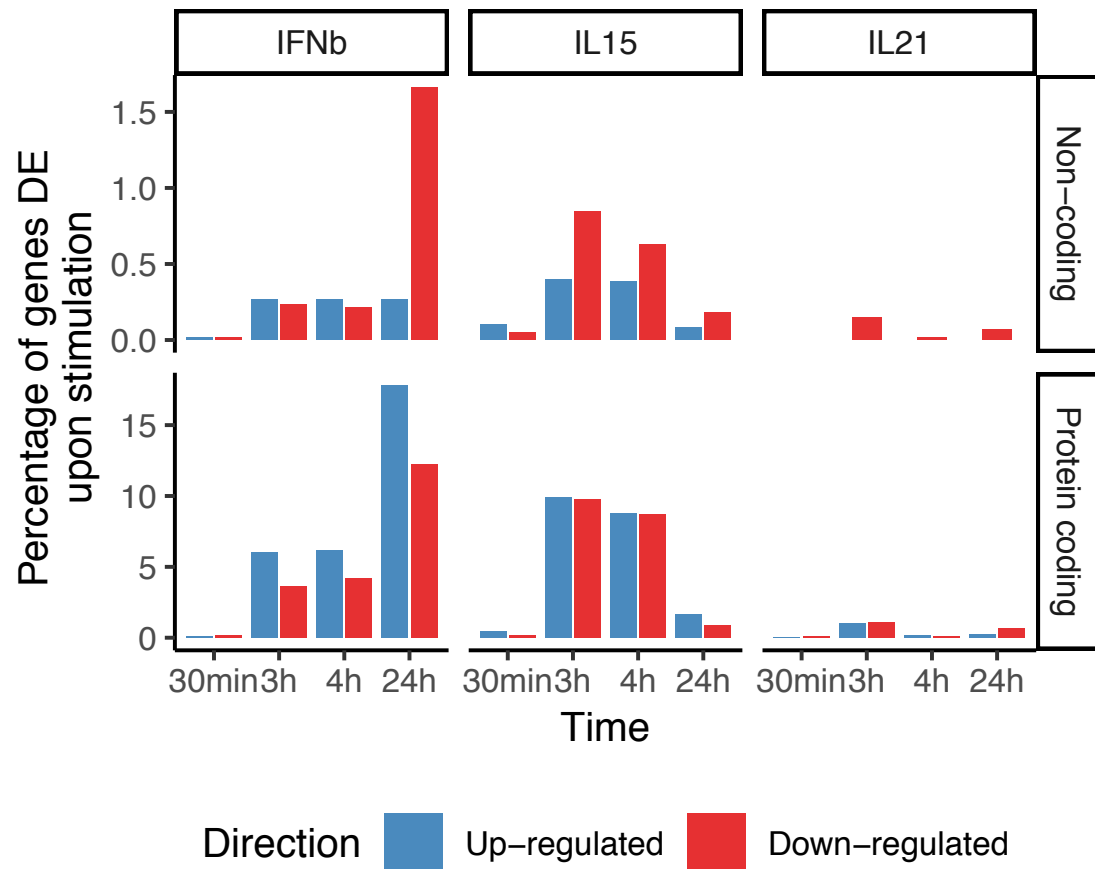

Supplement: mmc7.pdf [file mmc7.pdf]

**A**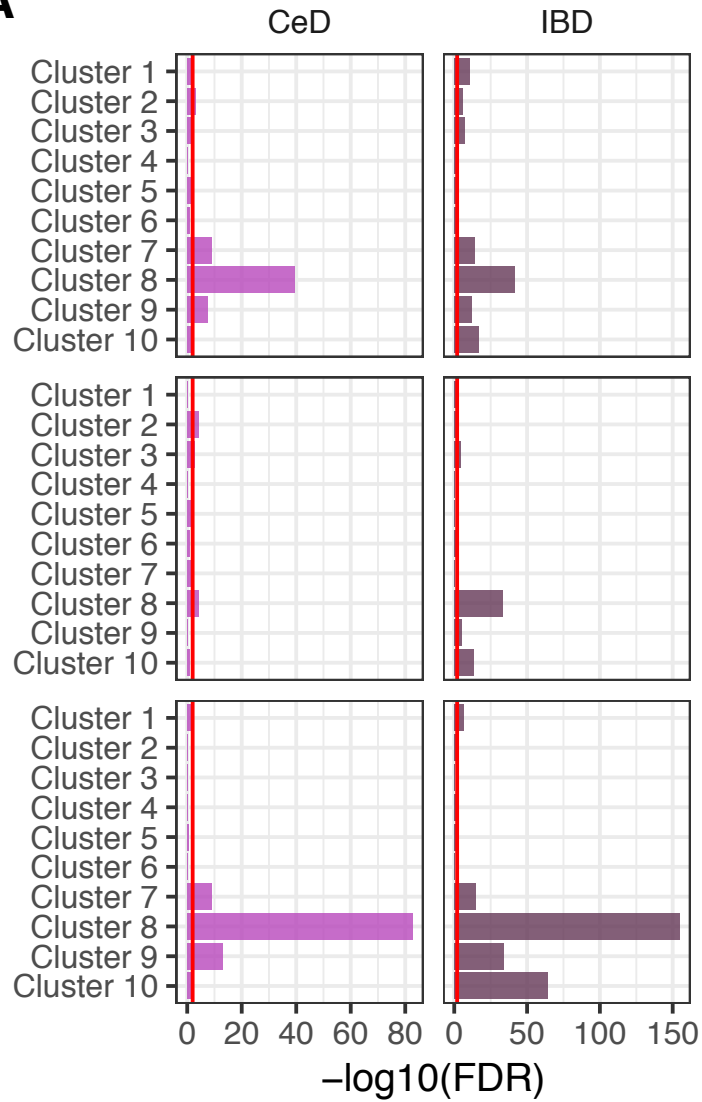**B**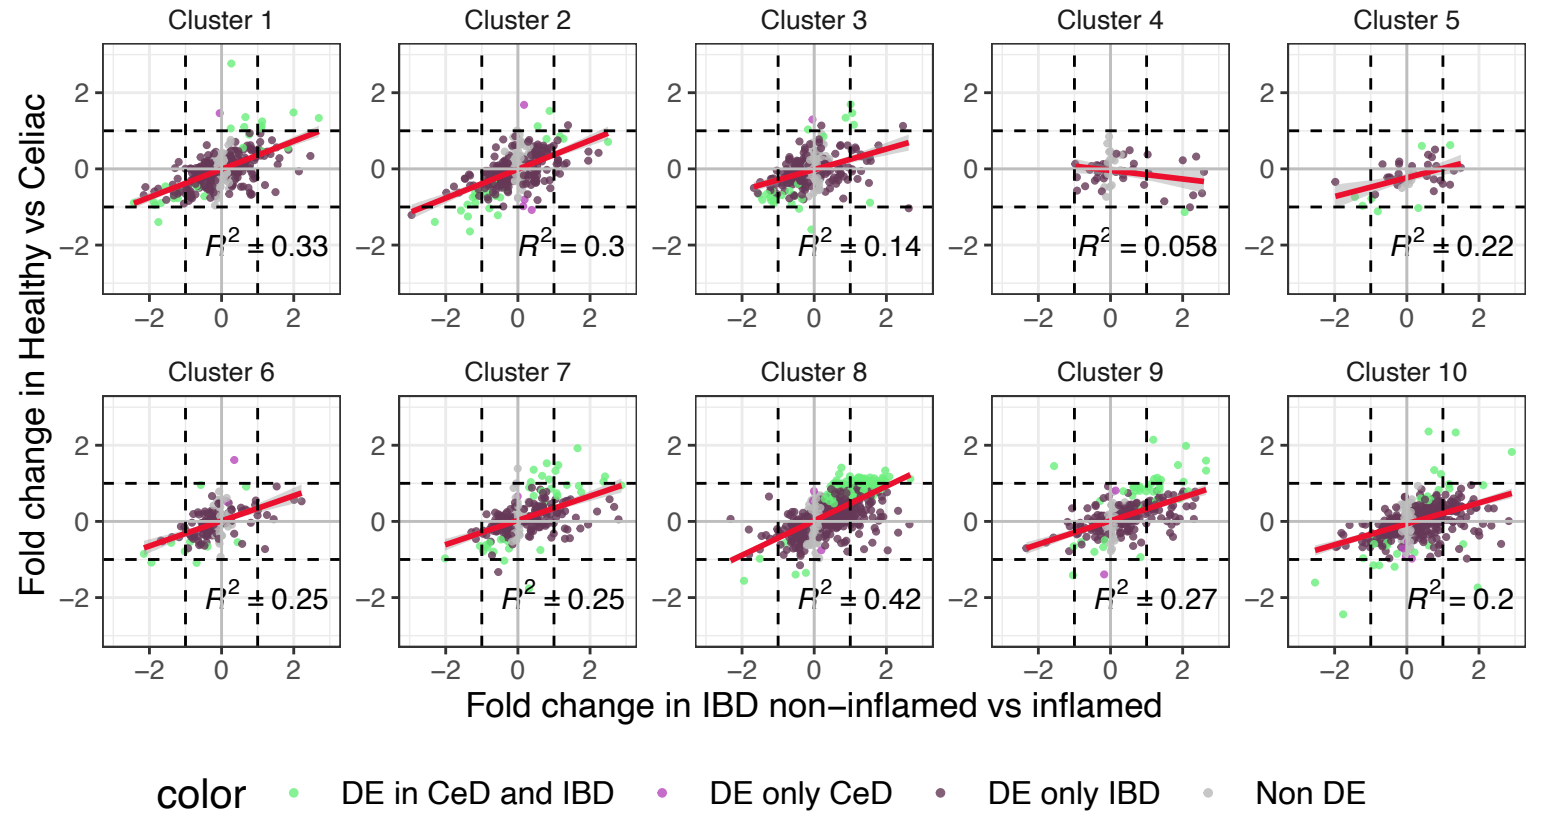

Supplement: mmc8.pdf [file mmc8.pdf]

**A**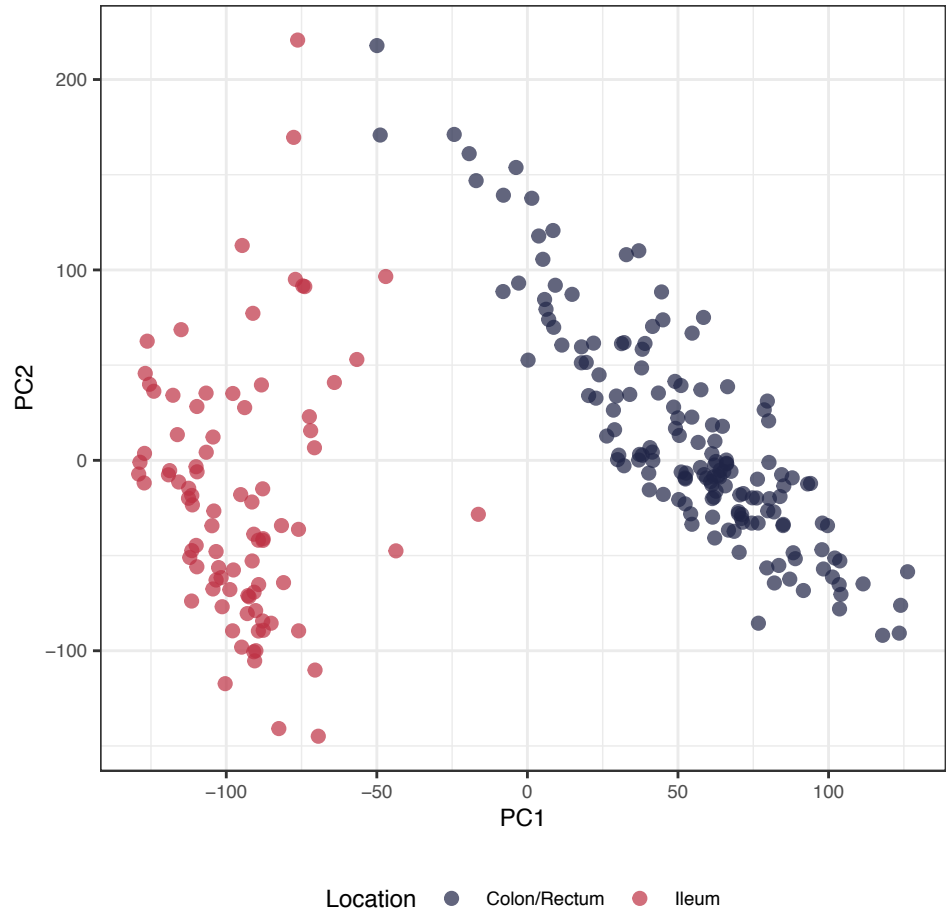**B**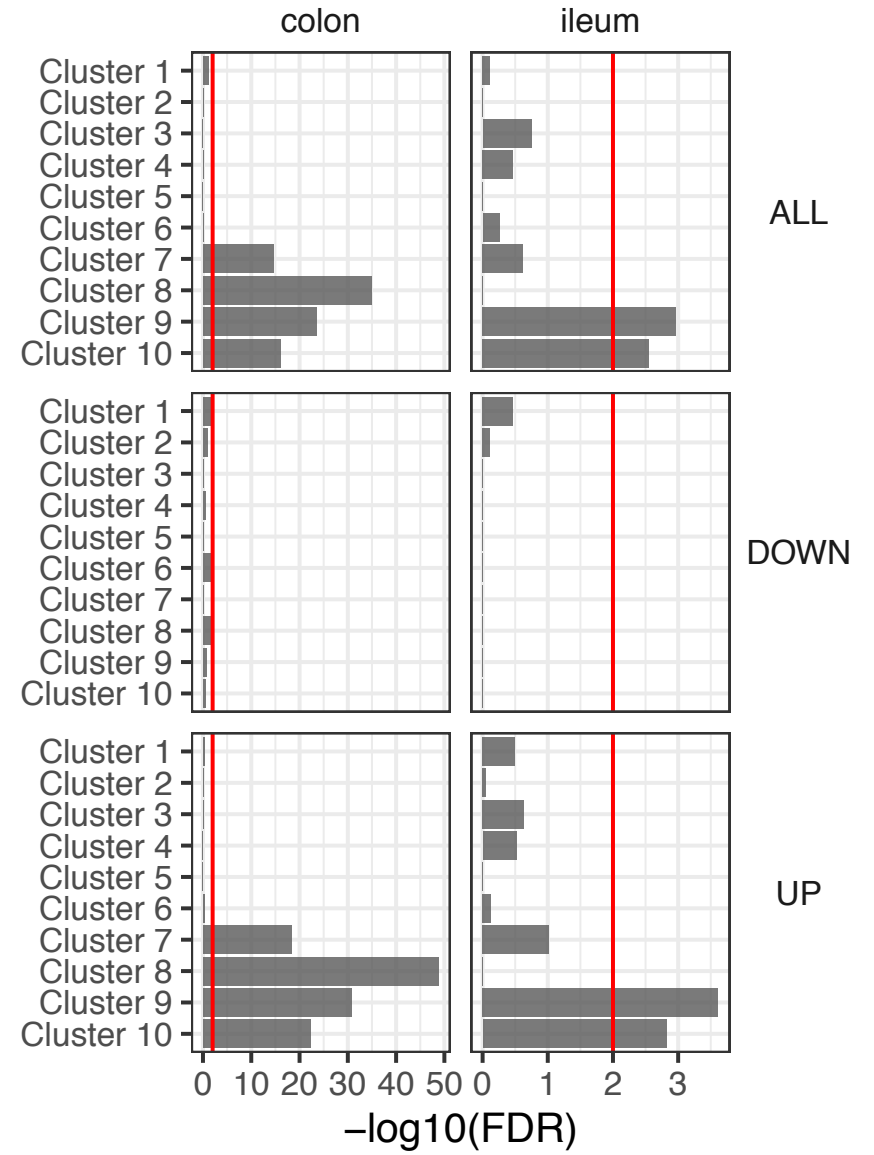

Supplement: mmc9.pdf [file mmc9.pdf]
